# Supplementary material
Source: publisher site journal article supplement (https://www.dovepress.com/article/269716)
Supplement: Supplementary file 1 [file get_supplementary_file.php]

**Supplement 1|** Designated scores to responses provided by participants to questions intended to measure overall adherence of the Saudi population to the home-stay strategy during the COVID-19 pandemic.

| **Questions** |  | **Choices [score]** |
| --- | --- | --- |
| **Do you leave home during the home-stay period?** |  | 1. No [1] 2. Yes [0] 3. Yes, but I have stayed home since the application of the curfew. [0.5] |
| **What is your main reason for leaving home?** |  | 1. I never left home [1] 2. Purchasing necessities [0.5] 3. Buying a meal [0] 4. Meeting with friends [0] 5. Going to work or hospital [0.5] 6. Having fun and leisure time [0] 7. Not taking any restrictions as there are no confirmed cases in my area [0] |
| **How many days do you leave home per week during the pandemic of COVID-19?** |  | 1. I never left home [1] 2. One day [0.75] 3. Two to three days [0.5] 4. Four to five days [0.25] 5. More than six days [0] |
| **Approximately, how much time per day do you spend outside during the COVID-19 pandemic?** |  | 1. I never left home [1] 2. Less than one hour [0.5] 3. Between one and two hours [0.25] 4. More than two hours [0] 5. Other [0] |
| **Who joins you when you leave home?** |  | 1. I never left home [1] 2. No one [0.5] 3. Adult [0.25] 4. Child [0] 5. Whoever wants to join [0] |

**Supplement 2|** Demographic characteristics of the participants in this study (n = 5105).

| **Demographic characteristics** | | **Number of participants**  **(% of participants)** |
| --- | --- | --- |
| **Gender** | Male | 2125 (41.6) |
| Female | 2980 (58.4) |
| **Age group** | 18-27 years old | 1500 (29.4) |
| 28-37 years old | 1884 (36.9) |
| 38-47 years old | 1059 (20.7) |
| Above 47 years | 662 (13.0) |
| **Marital status** | Single | 1779 (34.8) |
| Married | 3107 (60.9) |
| Divorced | 219 (4.3) |
| **Educational level** | Secondary and below | 1219 (23.9) |
| Diploma | 525 (10.3) |
| Bachelor | 2851 (55.8) |
| Master and PhD | 510 (10.0) |
| **Monthly income** | Less than 3000 SR | 2086 (40.9) |
| Between 3000-5999 SR | 703 (13.8) |
| Between 6000-10999SR | 734 (14.4) |
| Between 11000-15999 SR | 835 (16.4) |
| Between 16000-19999 SR | 392 (7.7) |
| Above 20000 SR | 355 (7.0) |
| **Employment** | Unemployed | 1515 (29.7) |
| Student | 695 (13.6) |
| Employed | 2310 (45.2) |
| Entrepreneur | 38 (0.7) |
| Retired | 307 (6.0) |
| Others | 240 (4.7) |
| **Geographical regions** | West | 2603 (51.0) |
| Middle | 1281 (25.1) |
| East | 268 (5.2) |
| North | 655 (12.8) |
| South | 298 (5.8) |
| **Do you live in** | City | 4787 (93.8) |
| Village | 318 (6.2) |
